# Supplementary material
Source: publisher figshare collection journal article supplement (https://acs.figshare.com/ndownloader/files/5186461)
Supplement: Supplementary file 1 [file 5186461]

## Supporting Information Available

# Hydrothermal Synthesis of Prismatic $\text{NaHoF}_4$ Microtubes and $\text{NaSmF}_4$ Nanotubes

Lifang Liang,<sup>†</sup> Huifang Xu,<sup>‡</sup> Qiang Su,<sup>†</sup> Hiromi Konishi,<sup>‡</sup> Yingbin Jiang,<sup>‡</sup> Mingmei Wu,<sup>†,‡</sup> Yifeng Wang,<sup>‡</sup> and Deying Xia<sup>‡</sup>

*State Key Laboratory of Optoelectronic Materials and Technologies, School of Chemistry and Chemical Engineering, Sun Yat-Sen (Zhongshan) University, Guangzhou, 510275, P. R. China*

*Transmission Electron Microscopy Lab, Department of Earth and Planetary Science, the University of New Mexico, 200 Yale Blvd., Albuquerque, NM 87131*

**Supporting Information 1** Powder XRD patterns of hydrothermal products in the system of  $\text{NaF-LnF}_3$  [ $\text{Ln}=(\text{a}) \text{Pr}, (\text{b}) \text{Nd}, (\text{c}) \text{Sm}, (\text{d}) \text{Eu}, (\text{e}) \text{Cd}, (\text{f}) \text{Tb}, (\text{g}) \text{Dy}, \text{ and } (\text{h}) \text{Ho}$ ].

**Supporting Information 2:** TEM images and an electron diffraction pattern of the  $\text{NaSmF}_4$  nanostructure. (a) Low magnification TEM image, (b)  $[0 \bar{1} 0]$  SAED pattern, and (c)  $[0 \bar{1} 0]$  HRTEM image. The forbidden 00l reflections with  $l = 2n+1$  appear in the  $[0 \bar{1} 0]$  SAED pattern, but the intensity is systematically weak or extinctive when the crystal is rotated along the c-axis.

**Supporting Information 3** SEM (upper row) and typical TEM (lower row) images of (a)  $\text{NaEuF}_4$ , (b)  $\text{NaGdF}_4$ , (c)  $\text{NaTbF}_4$ , and (d)  $\text{NaDyF}_4$ . The arrows point to the sections with solid interiors that initially serve as seeds. All images in upper row are at the same scale, as annotated in (b).

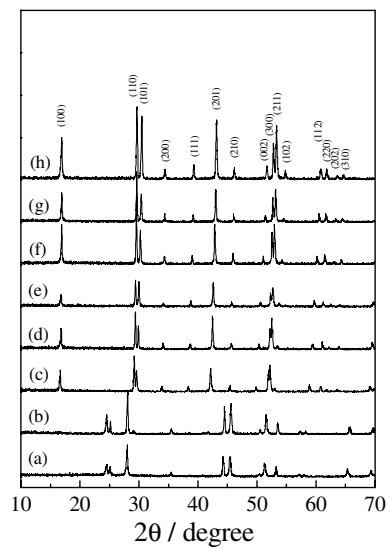

**Supporting Information 1** Powder XRD patterns of hydrothermal products in the system of  $\text{NaF-LnF}_3$  [ $\text{Ln}=(\text{a}) \text{Pr}$ ,  $(\text{b}) \text{Nd}$ ,  $(\text{c}) \text{Sm}$ ,  $(\text{d}) \text{Eu}$ ,  $(\text{e}) \text{Cd}$ ,  $(\text{f}) \text{Tb}$ ,  $(\text{g}) \text{Dy}$ , and  $(\text{h}) \text{Ho}$ ].

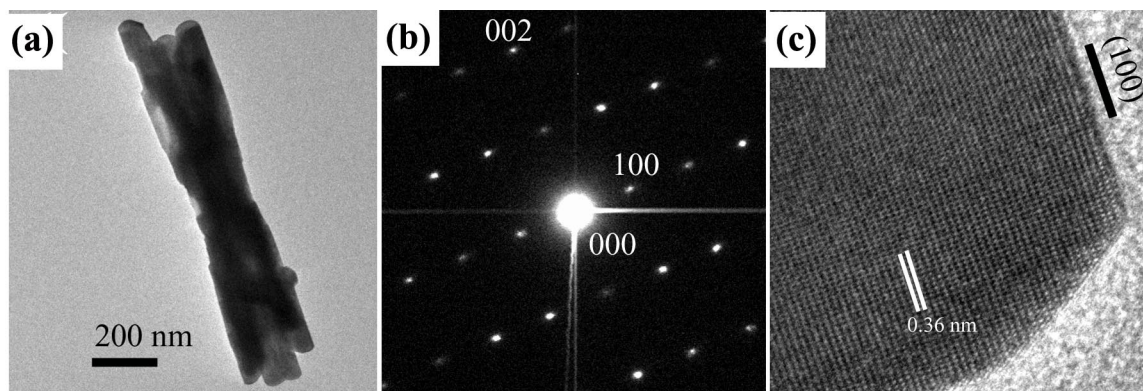

**Supporting Information 2:** TEM images and an electron diffraction pattern of the  $\text{NaSmF}_4$  nanostructure. (a) Low magnification TEM image, (b)  $[0 \bar{1} 0]$  SAED pattern, and (c)  $[0 \bar{1} 0]$  HRTEM image. The forbidden  $00l$  reflections with  $l = 2n+1$  appear in the  $[0 \bar{1} 0]$  SAED pattern, but the intensity is systematically weak or extinctive when the crystal is rotated along the  $c$ -axis.

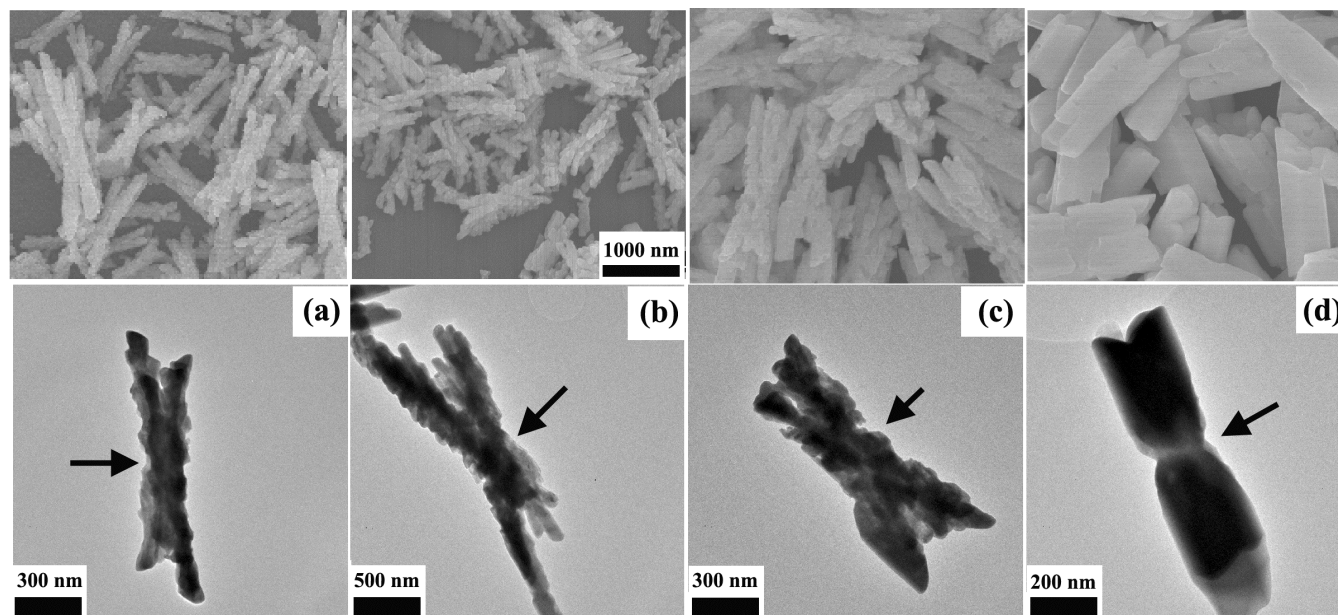

**Supporting Information 3** SEM (upper row) and typical TEM (lower row) images of (a)  $\text{NaEuF}_4$ , (b)  $\text{NaGdF}_4$ , (c)  $\text{NaTbF}_4$ , and (d)  $\text{NaDyF}_4$ . The arrows point to the sections with solid interiors that initially serve as seeds. All images in upper row are at the same scale, as annotated in (b).
